# Supplementary material
Source: Elsevier journal article supplement (https://www.sciencedirect.com/science/article/pii/S1695403316301503)
Supplement: mmc1 [file S1695403316301503:mmc1.docx]

**Bibliografía complementaria. Referencias de los estudios incluidos en la revisión de las intervenciones clínicas en sobrepeso y obesidad infantil**

**Criterios de derivación (tabla 3)**

Seibert TS, Allen DB, Carrel AL. Adolescent obesity and its risks: How to screen and when to refer: Case-based review. J Clin Outcomes Manage. 2014;21(2):87-96.

Walsh CO, Milliren CE, Feldman HA, Taveras EM. Factors affecting subspecialty referrals by pediatric primary care providers for children with obesity-related comorbidities. Clin Pediatr (Phila). 2013;52(8):777-85.

Yaeger-Yarom G, Nemet D, Eliakim A. Causes and patterns of referral to a tertiary, multidisciplinary program for the treatment of childhood obesity. J Pediatr Endocrinol Metab. 2011;24(5-6):303-6.

Banks J, Shield JPH, Sharp D. Barriers engaging families and GPs in childhood weight management strategies. Br J Gen Pract. 2011;61(589):e492-e497.

Van Der Baan-Slootweg O, Benninga MA, Beelen A, Van Der Palen J, Tamminga-Smeulders C, Tijssen JGP, et al. Inpatient treatment of children and adolescents with severe obesity in the Netherlands: A randomized clinical trial. JAMA Pediatr. 2014;168(9):807-14.

Richardson L, Paulis WD, Van Middelkoop M, Koes BW. An overview of national clinical guidelines for the management of childhood obesity in primary care. Prev Med. 2013;57(5):448-55.

**Intervenciones en nutrición y alimentación (tabla 4)**

Ebbeling CB, Feldman HA, Chomitz VR, Antonelli TA, Gortmaker SL, Osganian SK, et al. A randomized trial of sugar-sweetened beverages and adolescent body weight. N Engl J Med. 2012;367(15):1407-16.

Bourke M, Whittaker PJ, Verma A. Are dietary interventions effective at increasing fruit and vegetable consumption among overweight children? A systematic review. J Epidemiol Community Health. 2014;68(5):485-90.

Osei-Assibey G, Dick S, MacDiarmid J, Semple S, Reilly JJ, Ellaway A, et al. The influence of the food environment on overweight and obesity in young children: A systematic review. BMJ Open. 2012;2(6): doi:10.1136/bmjopen-2012-001538.

Pérez-Escamilla R, Obbagy JE, Altman JM, Essery EV, McGrane MM, Wong YP, et al. Dietary Energy Density and Body Weight in Adults and Children: A Systematic Review. J Acad Nutr Diet. 2012;112(5):671-84.

Van Hoek E, Feskens EJM, Bouwman LI, Janse AJ. Effective interventions in overweight or obese young children: Systematic review and meta-analysis. Child Obes. 2014;10(6):448-60.

Ho M, Garnett SP, Baur LA, Burrows T, Stewart L, Neve M, et al. Impact of dietary and exercise interventions onweight change andmetabolic outcomes in obese children and adolescents a systematic review and meta-analysis of randomized trials. JAMA Pediatr. 2013;167(8):759-68.

Van Der Kruk JJ, Kortekaas F, Lucas C, Jager-Wittenaar H. Obesity: A systematic review on parental involvement in long-term European childhood weight control interventions with a nutritional focus. Obes Rev. 2013;14(9):745-60.

Ajie WN, Chapman-Novakofski KM. Impact of computer-mediated, obesity-related nutrition education interventions for adolescents: A systematic review. J Adolesc Health. 2014;54(6):631-45.

Hamilton-Shield J, Goodred J, Powell L, Thorn J, Banks J, Hollinghurst S, et al. Changing eating behaviours to treat childhood obesity in the community using Mandolean: the Community Mandolean randomised controlled trial (ComMando)--a pilot study. Health Technol Assess. 2014;18(47):i-75.

**Intervenciones en actividad física y sedentarismo (tabla 5)**

Madsen K, Garber A, Martin M, Gonzaga M, Linchey J. The feasibility of a physical activity referral network for pediatric obesity. Child Obes. 2014;10(2):169-74.

Metcalf B, Henley W, Wilkin T. Effectiveness of intervention on physical activity of children: systematic review and meta-analysis of controlled trials with objectively measured outcomes (EarlyBird 54). BMJ. 2012;345:e5888.

Cesa CC, Sbruzzi G, Ribeiro RA, Barbiero SM, de Oliveira PR, Eibel B, et al. Physical activity and cardiovascular risk factors in children: meta-analysis of randomized clinical trials. Prev Med. 2014 ;69C:54-62.

Escalante Y, Saavedra JM, GarcÇða-Hermoso A, DomÇðnguez AM. Improvement of the lipid profile with exercise in obese children: A systematic review. Prev Med. 2012;54(5):293-301.

Vasconcellos F, Seabra A, Katzmarzyk PT, Kraemer-Aguiar LG, Bouskela E, Farinatti P. Physical activity in overweight and obese adolescents: Systematic review of the effects on physical fitness components and cardiovascular risk factors. Sports Med. 2014;44(8):1139-52.

Aguilar Cordero MJ, Ortegon PA, Mur VN, Sanchez Garcia JC, Garcia Verazaluce JJ, Garcia GI, et al. [Physical activity programmes to reduce overweight and obesity in children and adolescents; a systematic review]. Nutr Hosp. 2014;30(4):727-40.

Kelley GA, Kelley KS. Effects of exercise in the treatment of overweight and obese children and adolescents: a systematic review of meta-analyses. J Obes. 2013;2013:783103.

Kelley GA, Kelley KS, Pate RR. Effects of exercise on BMI z-score in overweight and obese children and adolescents: a systematic review with meta-analysis. BMC Pediatr. 2014;14:225.

García-Hermoso A, Saavedra JM, Escalante Y. Effects of exercise on resting blood pressure in obese children: A meta-analysis of randomized controlled trials. Obes Rev. 2013;14(11):919-28.

Friedrich RR, Schuch I, Wagner MB. Effect of interventions on the body mass index of school-age students. Rev Saude Publica. 2012;46(3):551-60.

Liao Y, Liao J, Durand CP, Dunton GF. Which type of sedentary behaviour intervention is more effective at reducing body mass index in children? A meta-analytic review. Obes Rev. 2014;15(3):159-68.

Wahi G, Parkin PC, Beyene J, Uleryk EM, Birken CS. Effectiveness of interventions aimed at reducing screen time in children: a systematic review and meta-analysis of randomized controlled trials. Arch Pediatr Adolesc Med. 2011;165(11):979-86.

Marsh S, Foley LS, Wilks DC, Maddison R. Family-based interventions for reducing sedentary time in youth: a systematic review of randomized controlled trials. Obes Rev. 2014;15(2):117-33.

Schmidt ME, Haines J, O'Brien A, McDonald J, Price S, Sherry B, et al. Systematic review of effective strategies for reducing screen time among young children. Obesity (Silver Spring). 2012;20(7):1338-54.

**Intervenciones psicológicas (tabla 6)**

Braet C, O'Malley G, Weghuber D, Vania A, Erhardt E, Nowicka P, et al. The assessment of eating behaviour in children who are obese: A psychological approach. A position paper from the european childhood obesity group. Obes Facts. 2014;7(3):153-64.

Altman M, Wilfley DE. Evidence Update on the Treatment of Overweight and Obesity in Children and Adolescents. J Clin Child Adolesc Psychol. 2015;44(4)521-37..

**Intervenciones combinadas y otras (tabla 7)**

Reinehr T. Symposium III: Metabolic health, weight management and obesity prevention in childhood and adolescence: Effectiveness of lifestyle intervention in overweight children. Proc Nutr Soc. 2011;70(4):494-505.

Reinehr T. Lifestyle intervention in childhood obesity: Changes and challenges. Nat Rev Endocrionol. 2013;9(10):607-14.

Ewald H, Kirby J, Rees K, Robertson W. Parent-only interventions in the treatment of childhood obesity: a systematic review of randomized controlled trials. J Public Health (Oxf). 2014 Sep;36(3):476-89.

Gayes LA, Steele RG. A meta-analysis of motivational interviewing interventions for pediatric health behavior change. J Consult Clin Psychol. 2014;82(3):521-35.

Ho M, Garnett SP, Baur L, Burrows T, Stewart L, Neve M, et al. Effectiveness of lifestyle interventions in child obesity: Systematic review with meta-analysis. Pediatrics. 2012;130(6):e1647-e1671.

Hillier-Brown FC, Bambra CL, Cairns JM, Kasim A, Moore HJ, Summerbell CD, et al. A systematic review of the effectiveness of individual, community and societal level interventions at reducing socioeconomic inequalities in obesity amongst children. BMC Public Health. 2014;14(1) doi: 10.1186/1471-2458-14-834

Janicke DM, Steele RG, Gayes LA, Lim CS, Clifford LM, Schneider EM, et al. Systematic review and meta-analysis of comprehensive behavioral family lifestyle interventions addressing pediatric obesity. J Pediatr Psychol. 2014;39(8):809-25.

Leech RM, Mcnaughton SA, Timperio A. The clustering of diet, physical activity and sedentary behavior in children and adolescents: a review. Int J Behav Nutr Phys Act. 2014;11:doi: 10.1186/1479-5868-11-4.

Sargent GM, Pilotto LS, Baur LA. Components of primary care interventions to treat childhood overweight and obesity: A systematic review of effect. Obes Rev. 2011;12(501):e219-e235.

Oude LH, Baur L, Jansen H, Shrewsbury VA, O'Malley C, Stolk RP, et al. Interventions for treating obesity in children. Cochrane Database Syst Rev. 2009;(1):CD001872.

Taveras EM, Marshall R, Kleinman KP, Gillman MW, Hacker K, Horan CM, et al. Comparative Effectiveness of Childhood Obesity Interventions in Pediatric Primary Care: A Cluster-Randomized Clinical Trial. JAMA Pediatr. 2015;169(6)535-42.

Ahuja S, Shankar P, Koss S. Sleep deprivation and its effect on obesity and other health disorders. Agro Food Ind Hi-Tech. 2014;25(6):40-4.

Magee L, Hale L. Longitudinal associations between sleep duration and subsequent weight gain: a systematic review. Sleep Med Rev. 2012;16(3):231-41.

Nielsen LS, Danielsen KV, SÇ÷rensen TIA. Short sleep duration as a possible cause of obesity: Critical analysis of the epidemiological evidence. Obes Rev. 2011;12(2):78-92.

Trost SG, Sundal D, Foster GD, Lent MR, Vojta D. Effects of a pediatric weight management program with and without active video games a randomized trial. JAMA Pediatr. 2014;168(5):407-13.
